# Supplementary material
Source: publisher figshare collection journal article supplement (https://sage.figshare.com/ndownloader/files/18080282)
Supplement: Supplementary file 1 [file 18080282]

**Supplemental Table S1.** Contingency Table of VS Surgical Volume by Year.

|       | 2008      | 2009       | 2010       | 2011        | 2012        | 2013        | 2014        | 2015        | 2016        |
|-------|-----------|------------|------------|-------------|-------------|-------------|-------------|-------------|-------------|
| RS    | 9 (60%)   | 19 (67.9%) | 37 (71.9%) | 108 (77.1%) | 138 (81.2%) | 185 (74.9%) | 225 (77.3%) | 263 (74.5%) | 281 (74.9%) |
| TL    | 2 (13.3%) | 5 (17.9%)  | 6 (11.5%)  | 22 (15.7%)  | 25 (14.7%)  | 43 (17.4%)  | 50 (17.2%)  | 68 (19.3%)  | 71 (18.9%)  |
| MCF   | 4 (26.7%) | 4 (14.3%)  | 9 (17.3%)  | 10 (7.1%)   | 7 (4.1%)    | 19 (7.7%)   | 16 (5.5%)   | 22 (6.2%)   | 23 (6.1%)   |
| Total | 15        | 28         | 52         | 140         | 170         | 247         | 291         | 353         | 375         |

MCF = middle cranial fossa; RS = retrosigmoid; TL = translabyrinthine
